# Supplementary material for: Locus-Specific Isolation of the Nanog Chromatin Identifies Regulators Relevant to Pluripotency of Mouse Embryonic Stem Cells and Reprogramming of Somatic Cells
Source: MDPI journal article supplement (doi:10.3390/ijms232315242), 2022-12-03
Supplement: s1 [file s1]

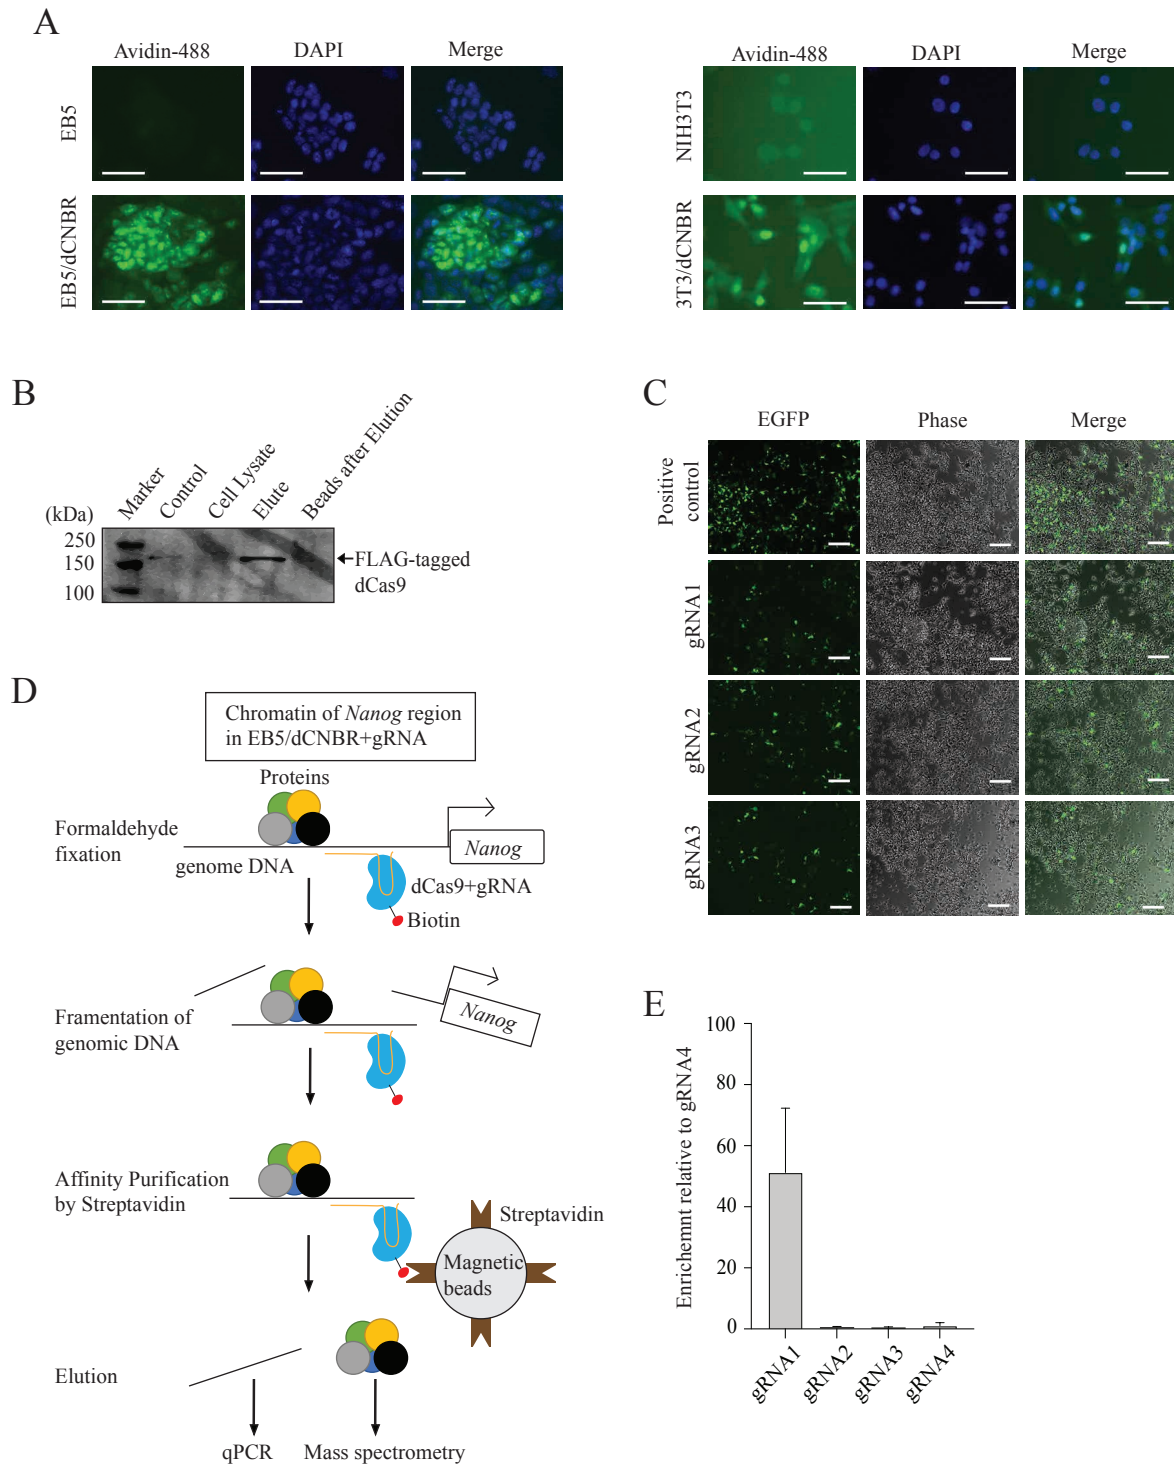

**Figure S1.** Preparation of the CAPTURE components. **(A)** Expression of biotin-labeled dCas9 from SeVdp(dCNBR). Mock or SeVdp(dCNBR)-infected EB5 or NIH3T3 cells were labeled with Alexa Fluor 488-conjugated Avidin. Scale bars, 50  $\mu$ m. **(B)** Enrichment of biotin-labelled dCas9 protein using streptavidin beads. Whole cell lysate was prepared from 3T3/dCNBR cells and treated with streptavidin beads. Cell lysate, eluted product, and remained protein on beads after elution were subjected to western blot using anti-FLAG antibody. Cell lysate from NIH3T3 cells transfected with a plasmid expressing FLAG-tagged Cas9 was used as control. **(C)** Efficiency of gRNAs. HEK293T cells were transfected with a plasmid expressing indicated gRNA and Cas9 as well as a donor plasmid spanning *Nanog* promoter region in EGFP ORF. EGFP expression was observed 3 days after transfection. We also used previously described gRNA and its target sequence [31] as positive control. Scale bars, 50  $\mu$ m. **(D)** Schematic representation of the CAPTURE method of the *Nanog* promoter. Chromatin from EB5/dCNBR cells with gRNA2 or control gRNA (gRNA4) were isolated and fragmented. Then, DNA-protein complexes were affinity-purified by streptavidin beads and analyzed either in qPCR or mass spectrometry. **(E)** Enrichment of *Nanog* promoter DNA by CAPTURE with gRNAs. Chromatins were collected from 3T3/dCNBR cells expressing the indicated gRNA, and fragmented chromatins were affinity purified with streptavidin beads. Enrichment of the *Nanog* promoter in the purified chromatins was calculated by qPCR for *Nanog* promoter. Enrichment was normalized by fold enrichment of gRNA4-transduced control. Data are represented as the means  $\pm$  SEM of three independent experiments.

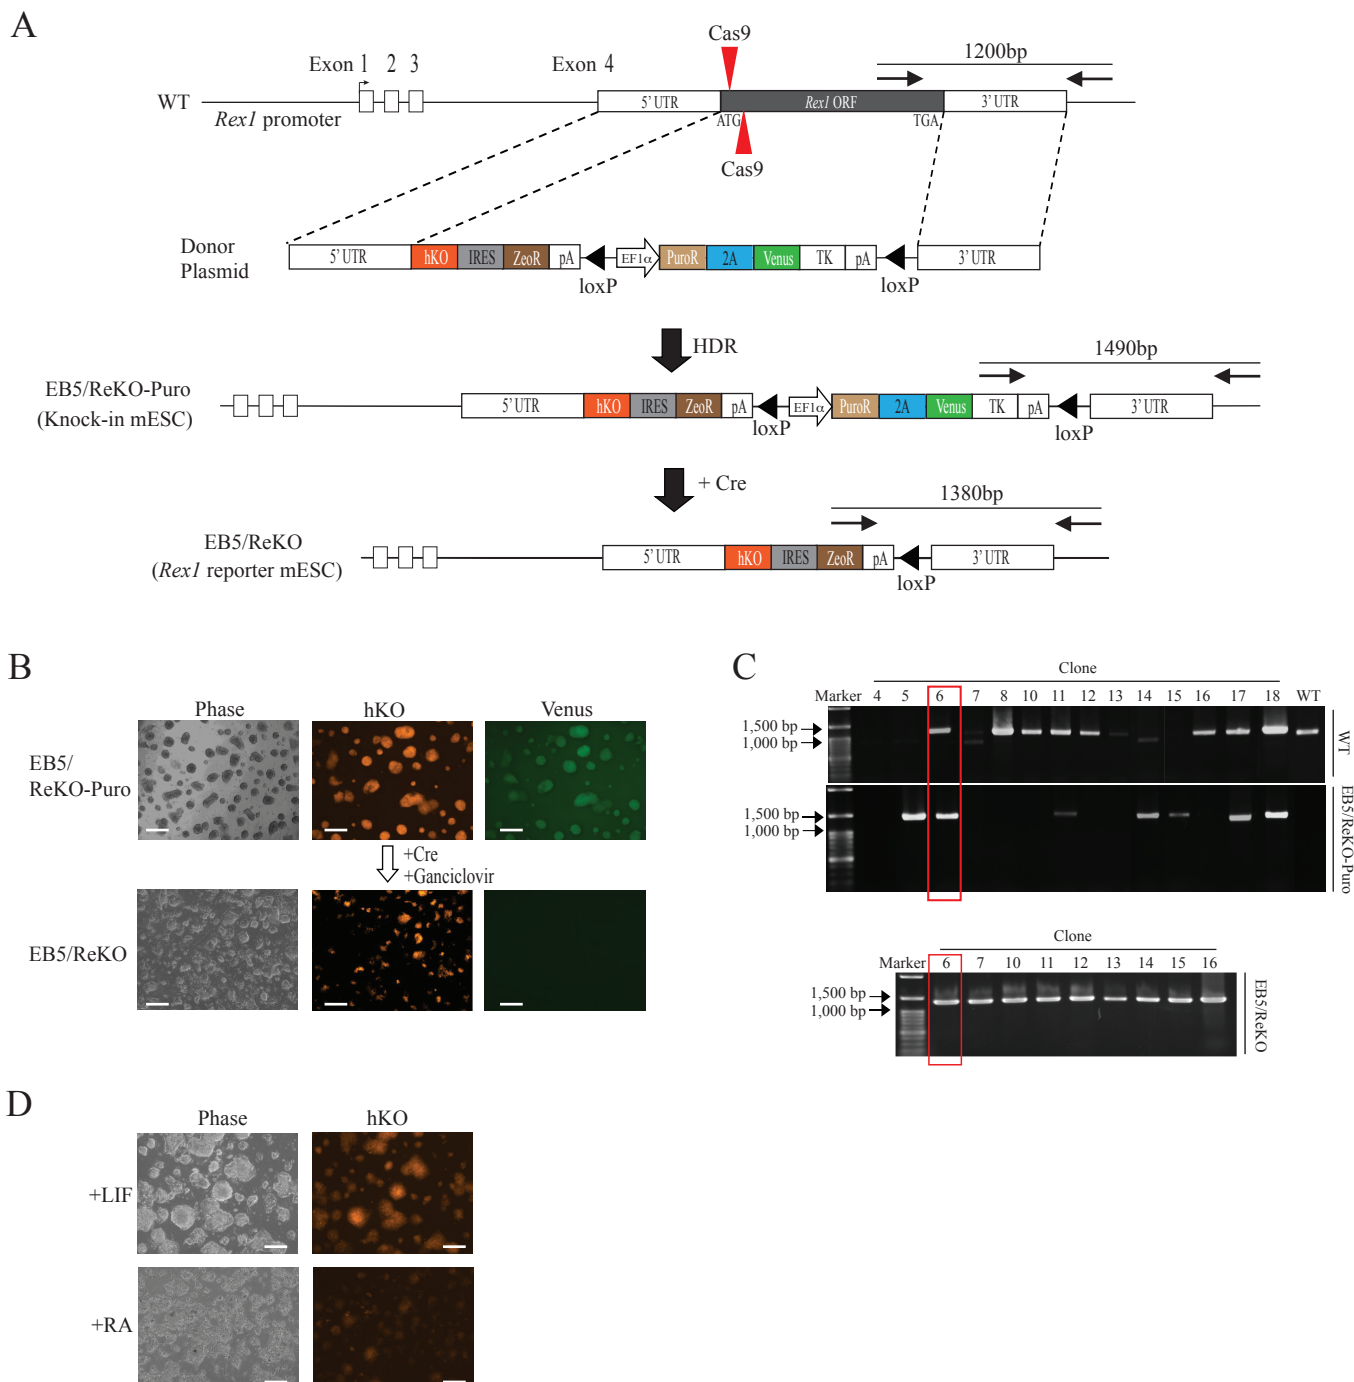

**Figure S2.** Generation of pluripotency monitoring mESCs. **(A)** Schematics of a production of *RexI* monitoring mESC. Plasmid encoding Cas9 and gRNA targeting to exon 4 of *RexI* locus was transfected to EB5 cells. Donor plasmid containing homologous region including 5'- and 3'-UTR and encoding Kusabira Orange (hKO), Zeocin resistant gene (ZeoR), Puromycin resistant gene (PuroR), Venus, and Thymidine kinase (TK) is also transfected at the same time. Knock-in cells undergoing homologous DNA repair (HDR) were selected by Puromycin. After cloning of puromycin-resistant cells, their genomic DNAs were subjected to genotyping to find EB5/ReKO-Puro cells. Then, Cre recombinase was expressed in EB5/ReKO-Puro cells to remove PuroR, Venus, and TK which locate between loxP sequence. Genome DNAs from ganciclovir-resistant clones were used for final genotyping to confirm production of *RexI* reporter mESC (EB5/ReKO). **(B)** Fluorescent gene expression in knock-in EB5 cells. hKO and Venus expression were investigated in EB5/ReKO-Puro and EB5/ReKO after puromycin selection for 10 days and ganciclovir treatment for 5 days, respectively. Scale bars, 200  $\mu$ m. **(C)** Genotyping knock-in EB5 cells. Genome DNA from puromycin-resistant clones were collected as indicated in **(A)** and subjected to genotyping PCR with primers for wild type (WT) and EB5/ReKO-Puro. EB5/ReKO-Puro clone 6 was used for further step. Genome DNA from ganciclovir-resistant clones were collected as indicated in **(A)** and subjected to PCR with primers for EB5/ReKO. Finally, EB5/ReKO clone 6 was selected as *RexI* reporter mESC. **(D)** Expression change of reporter gene according to pluripotency. EB5/ReKO clone 6 was cultured in mESC medium (+LIF) or DMEM medium plus 5  $\mu$ M of retinoic acid (+RA) for 7 days. Scale bars, 100  $\mu$ m.

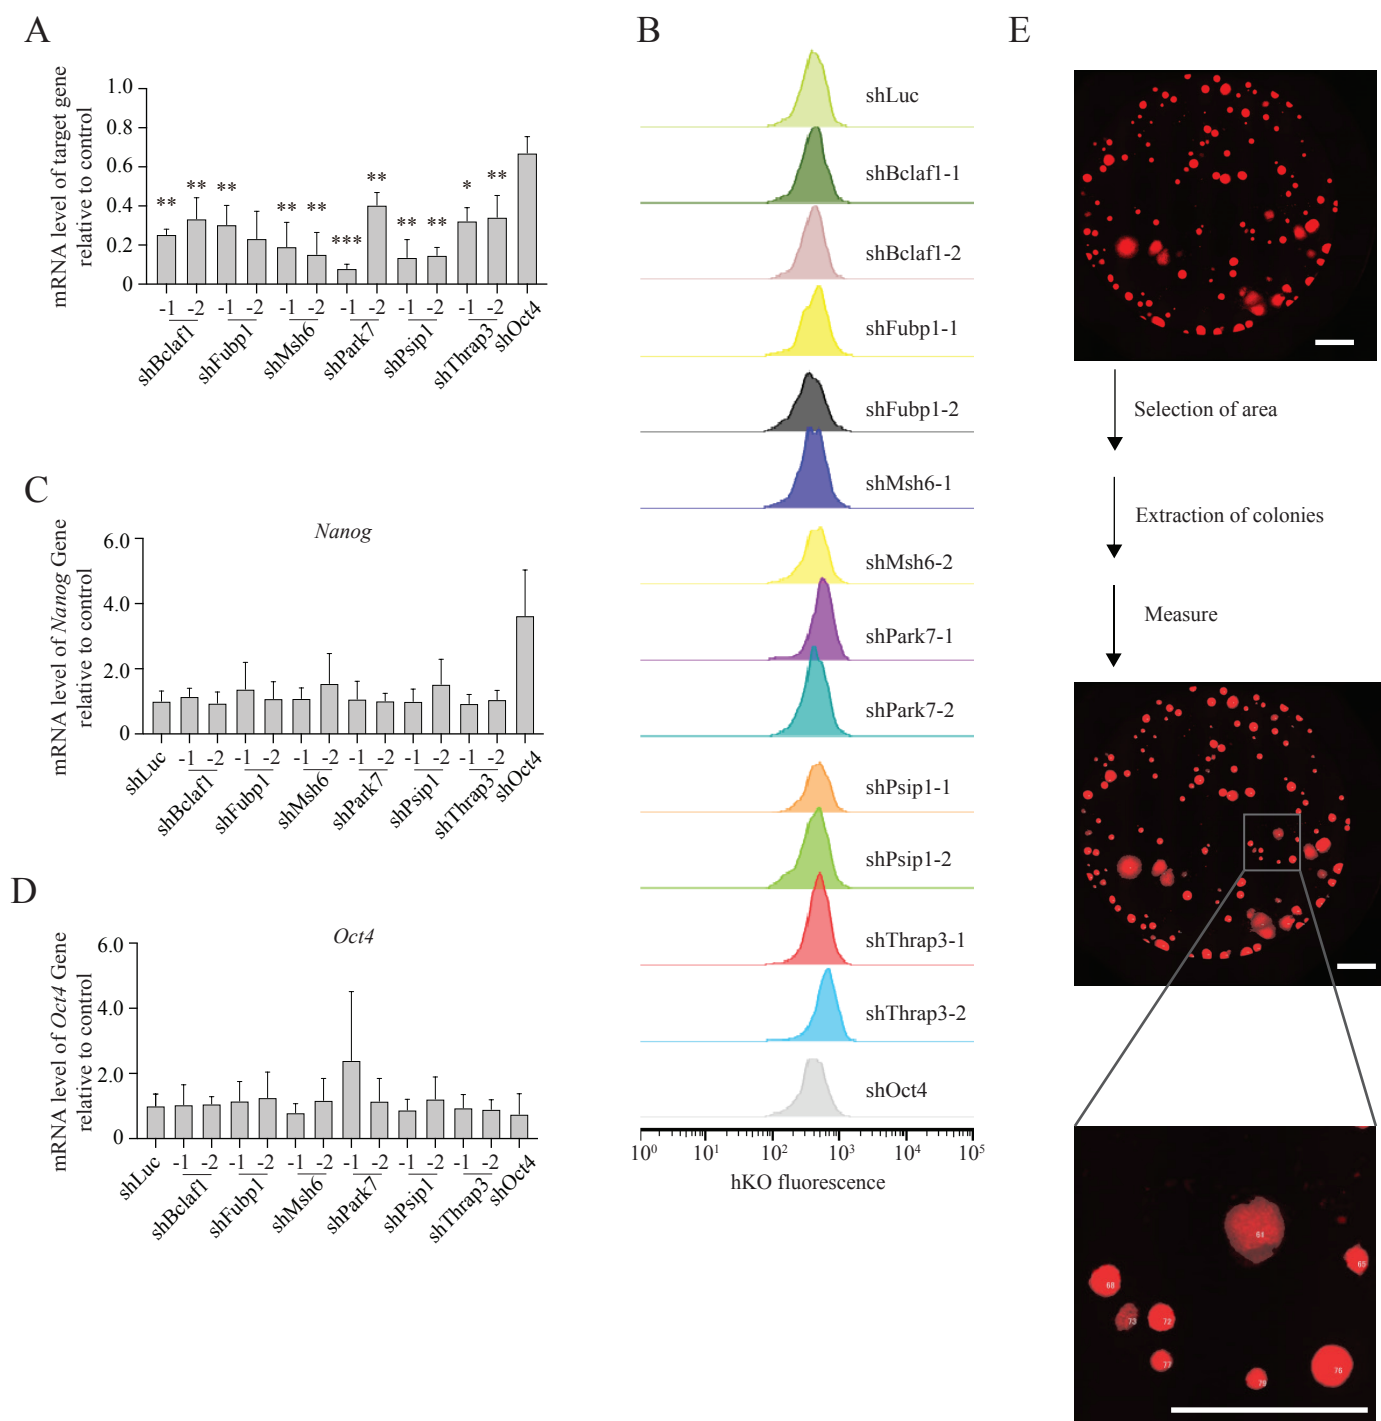

**Figure S3.** Analyses of mESC with knockdown of identified proteins. **(A)** Suppression of each target gene expression by shRNA. EB5/ReKO cells were transduced with retroviral vector expressing the indicated shRNA followed by puromycin selection. mRNA levels of each target gene were determined 5 days after transduction. Data represent mean  $\pm$  SEM from three independent experiments. \* $P < 0.05$ , \*\* $P < 0.01$ , \*\*\* $P < 0.001$  versus EB5 cells treated with control shRNA (shLuc). **(B)** hKO fluorescent level in *Rex1* reporter cells with shRNA treatment. EB5/ReKO cells were transduced as **(A)**. Five days after transduction, cells were analyzed for hKO expression using MoFlo XDP. Representative FACS histograms are shown. **(C, D)** Pluripotency of cells after shRNA treatment for 5 days. EB5/ReKO cells were transduced as **(A)**. *Nanog* **(C)** or *Oct4* **(D)** mRNA levels in the cells were determined 5 days after transduction. Data are represented as the means  $\pm$  SEM of three independent experiments. **(E)** Pipeline for image analyses of mESC colonies. mESC colonies expressing hKO were analyzed as described in Materials and Methods. Scale bars, 1,000  $\mu$ m.

**Table S1.** List of proteins identified by CAPTURE

| Accession | Gene Symb | ESC/MEF |
|-----------|-----------|---------|
| Q8BGQ7    | Aars      | < 2.0   |
| Q5SWU9    | Acaca     | < 2.0   |
| E9Q4Z2    | Acacb     | > 2.0   |
| Q07417    | Acads     | < 2.0   |
| Q9JIX8    | Acin1     | > 2.0   |
| Q99K10    | Aco2      | < 2.0   |
| Q32MW3    | Acot10    | < 2.0   |
| Q9R0X4    | Acot9     | < 2.0   |
| P68134    | Acta1     | < 2.0   |
| P62737    | Acta2     | < 2.0   |
| P60710    | Actb      | < 2.0   |
| P68033    | Actc1     | > 2.0   |
| P63260    | Actg1     | < 2.0   |
| P45376    | AKrlb3    | < 2.0   |
| P07724    | Alb       | < 2.0   |
| O55143    | Atp2a2    | < 2.0   |
| P56480    | Atp5b     | > 2.0   |
| Q9DB20    | Atp5o     | < 2.0   |
| P28658    | Atxn10    | < 2.0   |
| Q8C161    | Bag4      | > 2.0   |
| Q8K019    | Belaf1    | > 2.0   |
| P80317    | Cct6a     | NA      |
| Q61390    | Cct6b     | > 2.0   |
| P42932    | Cct8      | > 2.0   |
| Q61081    | Cdc37     | < 2.0   |
| Q6A068    | Cdc5l     | > 2.0   |
| P18760    | Cfl1      | < 2.0   |
| Q68FD5    | Cltc      | < 2.0   |
| P08122    | Col4a2    | < 2.0   |
| Q9QZS0    | Col4a3    | < 2.0   |
| O55029    | Copb2     | < 2.0   |
| Q9ERK4    | Cse1l     | > 2.0   |
| P16381    | D1Pas1    | < 2.0   |
| Q9J1I5    | Dazap1    | > 2.0   |
| Q501J6    | Ddx17     | < 2.0   |
| Q9JIK5    | Ddx21     | > 2.0   |
| Q8VDW0    | Ddx39     | > 2.0   |
| Q9Z1N5    | Ddx39b    | > 2.0   |
| Q62167    | Ddx3x     | > 2.0   |
| Q61656    | Ddx5      | < 2.0   |
| O35286    | Dhx15     | < 2.0   |
| Q9D2G2    | Dlst      | < 2.0   |
| Q9QYJ0    | Dnaja2    | < 2.0   |
| Q9CWR8    | Dnmt3l    | < 2.0   |
| P10126    | Eef1a1    | > 2.0   |
| P62631    | Eef1a2    | < 2.0   |
| O70251    | Eef1b2    | < 2.0   |
| Q9D8N0    | Eef1g     | < 2.0   |
| P58252    | Eef2      | < 2.0   |
| O08810    | Eftud2    | > 2.0   |
| P63242    | Eif5a     | > 2.0   |
| Q8BGY2    | Eif5a2    | < 2.0   |
| P17182    | Eno1      | > 2.0   |
| P17183    | Eno2      | < 2.0   |
| P21550    | Eno3      | < 2.0   |
| Q9DCW4    | Etfb      | < 2.0   |
| P62862    | Fau       | < 2.0   |
| P35550    | Fbl       | > 2.0   |
| Q80WS3    | Fbl1l     | < 2.0   |
| P39749    | Fen1      | > 2.0   |
| P97807    | Fhl       | < 2.0   |
| P30416    | Fkbp4     | > 2.0   |
| P11276    | Fn1       | < 2.0   |
| Q91WJ8    | Fubp1     | > 2.0   |
| P97855    | G3bp1     | > 2.0   |
| P16858    | Gapdh     | > 2.0   |
| P03975    | Gfap      | < 2.0   |
| Q61543    | Glg1      | < 2.0   |
| P50247    | Gm4737    | NA      |
| P05202    | Got2      | < 2.0   |
| P24472    | Gsta4     | > 2.0   |
| P10922    | H1f0      | < 2.0   |
| Q8R1M2    | H2afj     | < 2.0   |

| Accession | Gene Symb   | ESC/MEF |
|-----------|-------------|---------|
| Q3THW5    | H2afv       | > 2.0   |
| P27661    | H2afx       | > 2.0   |
| P0C0S6    | H2afz       | > 2.0   |
| P84244    | H3f3a       | < 2.0   |
| P02301    | H3f3c       | NA      |
| P01942    | Hba-a1      | < 2.0   |
| Q6NVF4    | Helb        | > 2.0   |
| P43275    | Hist1h1a    | > 2.0   |
| P43276    | Hist1h1b    | < 2.0   |
| P15864    | Hist1h1c    | < 2.0   |
| P43277    | Hist1h1d    | < 2.0   |
| P43274    | Hist1h1e    | < 2.0   |
| Q07133    | Hist1h1t    | < 2.0   |
| C0HKE4    | Hist1h2ac   | < 2.0   |
| Q8CGP5    | Hist1h2af   | > 2.0   |
| Q8CGP6    | Hist1h2ah   | > 2.0   |
| Q8CGP7    | Hist1h2ak   | > 2.0   |
| P70696    | Hist1h2ba   | < 2.0   |
| P68433    | Hist1h3g    | > 2.0   |
| Q6GSS7    | Hist2h2aa1  | < 2.0   |
| Q64522    | Hist2h2ab   | < 2.0   |
| Q64523    | Hist2h2ac   | < 2.0   |
| Q64524    | Hist2h2be   | < 2.0   |
| Q8BFU2    | Hist3h2a    | < 2.0   |
| Q9D2U9    | Hist3h2ba   | > 2.0   |
| Q8CGP0    | Hist3h2bb-p | < 2.0   |
| P17095    | Hmga1       | < 2.0   |
| P52927    | Hmga2       | < 2.0   |
| P63158    | Hmgb1       | < 2.0   |
| P30681    | Hmgb2       | > 2.0   |
| O54879    | Hmgb3       | < 2.0   |
| P09602    | Hmgn2       | < 2.0   |
| O88569    | Hnrnpa2b1   | < 2.0   |
| Q99020    | Hnrnpab     | > 2.0   |
| Q9Z204    | Hnrnpc      | > 2.0   |
| P61979    | Hnrnpk      | < 2.0   |
| Q8R081    | Hnrnpl      | > 2.0   |
| Q9D0E1    | Hnrnrm      | > 2.0   |
| Q8VEK3    | Hnrnpu      | > 2.0   |
| P07901    | Hsp90aa1    | > 2.0   |
| P11499    | Hsp90ab1    | > 2.0   |
| P08113    | Hsp90b1     | < 2.0   |
| Q61696    | Hspa1a      | < 2.0   |
| P17879    | Hspa1b      | < 2.0   |
| P16627    | Hspa1l      | < 2.0   |
| P17156    | Hspa2       | < 2.0   |
| P63017    | Hspa8       | > 2.0   |
| P14602    | Hspb1       | > 2.0   |
| P63038    | Hspd1       | > 2.0   |
| P54071    | Idh2        | < 2.0   |
| P33175    | Kif5a       | > 2.0   |
| Q61768    | Kif5b       | < 2.0   |
| P28738    | Kif5c       | < 2.0   |
| P04104    | Krt1        | < 2.0   |
| P08730    | Krt13       | > 2.0   |
| Q61781    | Krt14       | > 2.0   |
| Q61414    | Krt15       | < 2.0   |
| Q9QWL7    | Krt17       | < 2.0   |
| P19001    | Krt19       | < 2.0   |
| Q3TTY5    | Krt2        | < 2.0   |
| Q8K0Y2    | Krt33a      | < 2.0   |
| Q9D646    | Krt34       | < 2.0   |
| Q49714    | Krt35       | < 2.0   |
| Q6IFX3    | Krt40       | < 2.0   |
| Q6IFX2    | Krt42       | < 2.0   |
| Q922U2    | Krt5        | < 2.0   |
| Q9R0H5    | Krt71       | < 2.0   |
| Q6NXH9    | Krt73       | < 2.0   |
| Q6IFZ9    | Krt74       | < 2.0   |
| Q3UV17    | Krt76       | < 2.0   |
| Q6IFZ6    | Krt77       | < 2.0   |
| Q8VED5    | Krt79       | < 2.0   |
| P11679    | Krt8        | > 2.0   |

| Accession | Gene Symb | ESC/MEF |
|-----------|-----------|---------|
| Q9ERE2    | Krt81     | < 2.0   |
| Q99M74    | Krt82     | < 2.0   |
| P97861    | Krt86     | < 2.0   |
| P19137    | Lama1     | > 2.0   |
| P02469    | Lamb1     | < 2.0   |
| P48678    | Lmna      | < 2.0   |
| P14733    | Lmnbl     | > 2.0   |
| Q9D5S7    | Lrguk     | < 2.0   |
| Q8BGS0    | Mak16     | > 2.0   |
| P63085    | Mapk1     | < 2.0   |
| Q3THS6    | Mat2a     | > 2.0   |
| Q8K310    | Matr3     | < 2.0   |
| Q99MR8    | Mccc1     | < 2.0   |
| Q3ULD5    | Mccc2     | < 2.0   |
| P54276    | Msh6      | > 2.0   |
| Q7TPV4    | Mybbp1a   | > 2.0   |
| Q61879    | Myh10     | < 2.0   |
| Q8VDD5    | Myh9      | < 2.0   |
| Q8BWW3    | Naa25     | > 2.0   |
| Q8BP47    | Nars      | < 2.0   |
| P09405    | Ncl       | > 2.0   |
| P10493    | Nid1      | < 2.0   |
| Q9D6Z1    | Nop56     | > 2.0   |
| Q6DFW4    | Nop58     | > 2.0   |
| Q61937    | Npm1      | > 2.0   |
| P09103    | P4hb      | < 2.0   |
| P29341    | Pabpc1    | > 2.0   |
| Q9DCL9    | Paics     | > 2.0   |
| Q99LX0    | Park7     | > 2.0   |
| P11103    | Parp1     | > 2.0   |
| P24610    | Pax3      | < 2.0   |
| P47239    | Pax7      | < 2.0   |
| P60335    | Pcbp1     | > 2.0   |
| Q91ZA3    | Pcca      | < 2.0   |
| Q99MN9    | Pccb      | < 2.0   |
| P17918    | Pcna      | > 2.0   |
| Q05920    | Pcx       | < 2.0   |
| P35486    | Pdha1     | < 2.0   |
| Q8QZR7    | Pdik1l    | < 2.0   |
| P70296    | Pebp1     | < 2.0   |
| Q9DBJ1    | Pgam1     | > 2.0   |
| O70250    | Pgam2     | > 2.0   |
| P09411    | Pgk1      | < 2.0   |
| P09041    | Pgk2      | < 2.0   |
| O35129    | Phb2      | > 2.0   |
| Q8R1K4    | Phykpl    | NA      |
| P53657    | Pklr      | < 2.0   |
| P52480    | Pkm       | NA      |
| P17742    | Ppia      | > 2.0   |
| Q9CR16    | Ppid      | > 2.0   |
| Q99KR7    | Ppif      | > 2.0   |
| Q9D868    | Ppih      | > 2.0   |
| P35700    | Prdx1     | > 2.0   |
| Q9JIF0    | Prmt1     | > 2.0   |
| Q99JF8    | Psip1     | > 2.0   |
| P62334    | Psmc6     | < 2.0   |
| Q8VDM4    | Psmc2     | < 2.0   |
| P17225    | Ptbp1     | > 2.0   |
| Q8BHD7    | Ptbp3     | NA      |
| Q9R0Q7    | Ptges3    | > 2.0   |
| Q3UEB3    | Puf60     | < 2.0   |
| Q922W5    | Pycr1     | < 2.0   |
| Q922Q4    | Pycr2     | > 2.0   |
| P61027    | Rab10     | < 2.0   |
| Q9DD03    | Rab13     | < 2.0   |
| Q8K386    | Rab15     | < 2.0   |
| P62821    | Rab1a     | NA      |
| Q9D1G1    | Rab1b     | < 2.0   |
| Q6PHN9    | Rab35     | < 2.0   |
| P55258    | Rab8a     | < 2.0   |
| P61028    | Rab8b     | < 2.0   |
| Q64012    | Raly      | < 2.0   |
| P62827    | Ran       | > 2.0   |

| Accession | Gene Symb | ESC/MEF |
|-----------|-----------|---------|
| Q61820    | Ras12-9   | NA      |
| Q60972    | Rbbp4     | > 2.0   |
| Q60973    | Rbbp7     | < 2.0   |
| O89086    | Rbm3      | < 2.0   |
| Q8VH51    | Rbm39     | < 2.0   |
| Q9WV02    | RbmX      | < 2.0   |
| Q91VM5    | RbmX11    | NA      |
| Q9WUK4    | Rfc2      | > 2.0   |
| Q99J62    | Rfc4      | > 2.0   |
| P56716    | Rpl       | < 2.0   |
| Q6ZWV3    | Rpl10     | < 2.0   |
| P53026    | Rpl10a    | < 2.0   |
| P86048    | Rpl10l    | < 2.0   |
| Q9CXW4    | Rpl11     | < 2.0   |
| P35979    | Rpl12     | < 2.0   |
| P47963    | Rpl13     | < 2.0   |
| Q9CR57    | Rpl14     | > 2.0   |
| Q9CZM2    | Rpl15     | < 2.0   |
| P62717    | Rpl18a    | > 2.0   |
| P84099    | Rpl19     | < 2.0   |
| P67984    | Rpl22     | < 2.0   |
| P62751    | Rpl23a    | > 2.0   |
| P61358    | Rpl27     | > 2.0   |
| P14115    | Rpl27a    | < 2.0   |
| P62911    | Rpl32     | < 2.0   |
| P17932    | Rpl32-ps  | NA      |
| P83882    | Rpl36a    | < 2.0   |
| Q9D8E6    | Rpl4      | > 2.0   |
| P47962    | Rpl5      | > 2.0   |
| P47911    | Rpl6      | > 2.0   |
| P14148    | Rpl7      | < 2.0   |
| P12970    | Rpl7a     | > 2.0   |
| P63325    | Rps10     | < 2.0   |
| P62281    | Rps11     | < 2.0   |
| P63323    | Rps12     | < 2.0   |
| P62301    | Rps13     | < 2.0   |
| P62264    | Rps14     | < 2.0   |
| P62245    | Rps15a    | < 2.0   |
| P14131    | Rps16     | < 2.0   |
| P62270    | Rps18     | < 2.0   |
| P25444    | Rps2      | < 2.0   |
| P62267    | Rps23     | < 2.0   |
| P62852    | Rps25     | < 2.0   |
| P62855    | Rps26     | < 2.0   |
| P62983    | Rps27a    | < 2.0   |
| P62908    | Rps3      | < 2.0   |
| P97351    | Rps3a1    | NA      |
| P62702    | Rps4x     | < 2.0   |
| P62754    | Rps6      | < 2.0   |
| P62242    | Rps8      | < 2.0   |
| Q6ZWN5    | Rps9      | < 2.0   |
| Q9WTM5    | Ruvbl2    | > 2.0   |
| Q9D1J3    | Sarnp     | < 2.0   |
| Q8K2B3    | Sdha      | < 2.0   |
| P19324    | Serpinh1  | < 2.0   |
| Q99NB9    | Sf3b1     | < 2.0   |
| Q921M3    | Sf3b3     | > 2.0   |
| Q62407    | Speg      | < 2.0   |
| Q62261    | Sptbn1    | NA      |
| Q6PDM2    | Srsf1     | > 2.0   |
| P84104    | Srsf3     | > 2.0   |
| Q8VE97    | Srsf4     | > 2.0   |
| O35326    | Srsf5     | < 2.0   |
| Q3TWW8    | Srsf6     | > 2.0   |
| Q8BL97    | Srsf7     | > 2.0   |
| Q80ZW0    | Stk35     | > 2.0   |
| Q69ZM6    | Stk36     | < 2.0   |
| Q9WUM5    | Suclg1    | < 2.0   |
| Q920B9    | Supt16    | NA      |
| Q7TMK9    | Syncrip   | < 2.0   |
| Q9WVA4    | Tagln2    | < 2.0   |
| Q8C4J7    | Tbl3      | > 2.0   |
| P10711    | Tcea1     | NA      |
| Q9QVN7    | Tcea2     | < 2.0   |
| O08784    | Tcof1     | > 2.0   |
| Q8K3F7    | Tdh       | < 2.0   |
| Q569Z6    | Thrap3    | > 2.0   |
| P40142    | Tkt       | > 2.0   |
| Q62318    | Trim28    | > 2.0   |
| Q923J1    | Trpm7     | < 2.0   |

| Accession | Gene Symb | ESC/MEF |
|-----------|-----------|---------|
| Q9WTR1    | Trpv2     | < 2.0   |
| P68369    | Tuba1a    | < 2.0   |
| P05213    | Tuba1b    | > 2.0   |
| P68373    | Tuba1c    | < 2.0   |
| P68368    | Tuba4a    | > 2.0   |
| A2AQ07    | Tubb1     | < 2.0   |
| Q7TMM9    | Tubb2a    | < 2.0   |
| Q9CWF2    | Tubb2b    | < 2.0   |
| Q9ERD7    | Tubb3     | < 2.0   |
| Q9D6F9    | Tubb4a    | NA      |
| P68372    | Tubb4b    | NA      |
| P99024    | Tubb5     | < 2.0   |
| Q922F4    | Tubb6     | < 2.0   |
| Q8BFR5    | Tufm      | < 2.0   |
| P62984    | Uba52     | < 2.0   |
| P0CG49    | Ubb       | > 2.0   |
| P0CG50    | Ubc       | < 2.0   |
| Q6WKZ8    | Ubr2      | < 2.0   |
| P52624    | Upp1      | > 2.0   |
| Q8CGR7    | Upp2      | < 2.0   |
| Q01853    | Vcp       | < 2.0   |
| P62960    | Ybx1      | > 2.0   |
| P62259    | Ywhae     | > 2.0   |

NA: Data of RNA-Seq is not available

**Table S2.** Function and ontologies of selected proteins

| Gene symbol | Function                                             | GO Term Finder |                                      |              |                 |                 |                                                 |                                                                                      | MGI GO |
|-------------|------------------------------------------------------|----------------|--------------------------------------|--------------|-----------------|-----------------|-------------------------------------------------|--------------------------------------------------------------------------------------|--------|
|             |                                                      | RNA processing | ribonucleoprotein complex biogenesis | RNA splicing | mRNA processing | gene expression | RNA splicing, via transesterification reactions | RNA splicing, via transesterification reactions with bulged adenosine as nucleophile |        |
| Acacb       | acetyl-Coenzyme A carboxylase                        |                |                                      |              |                 | Acacb           |                                                 |                                                                                      |        |
| Acin1       | apoptotic chromatin condensation inducer 1           | Acin1          |                                      | Acin1        | Acin1           | Acin1           | Acin1                                           | Acin1                                                                                | YES    |
| Bclaf1      | BCL2-associated transcription factor 1               |                |                                      |              |                 | Bclaf1          |                                                 |                                                                                      | YES    |
| Cdc5l       | cell division cycle 5-like                           | Cdc5l          |                                      | Cdc5l        | Cdc5l           | Cdc5l           | Cdc5l                                           | Cdc5l                                                                                |        |
| Dazap1      | DAZ associated protein 1                             | Dazap1         |                                      | Dazap1       | Dazap1          | Dazap1          | Dazap1                                          | Dazap1                                                                               |        |
| Ddx21       | DEAD box helicase 21                                 | Ddx21          | Ddx21                                |              |                 | Ddx21           |                                                 |                                                                                      |        |
| Ddx39       | DEAD box helicase 39                                 | Ddx39          |                                      | Ddx39        | Ddx39           | Ddx39           | Ddx39                                           | Ddx39                                                                                |        |
| Ddx39b      | DEAD box helicase 39b                                | Ddx39b         | Ddx39b                               | Ddx39b       | Ddx39b          | Ddx39b          | Ddx39b                                          | Ddx39b                                                                               |        |
| Ddx3x       | DEAD box helicase 3                                  | Ddx3x          | Ddx3x                                |              |                 | Ddx3x           |                                                 |                                                                                      |        |
| Eef1a1      | eukaryotic translation elongation factor 1 alpha 1   |                |                                      |              |                 | Eef1a1          |                                                 |                                                                                      |        |
| Eftud2      | elongation factor Tu GTP binding domain containing 2 | Eftud2         |                                      | Eftud2       | Eftud2          | Eftud2          | Eftud2                                          | Eftud2                                                                               |        |
| Eif5a       | eukaryotic translation initiation factor 5A          |                |                                      |              |                 | Eif5a           |                                                 |                                                                                      |        |
| Eno1        | enolase 1, alpha                                     |                |                                      |              |                 | Eno1            |                                                 |                                                                                      | YES    |
| Fbl         | fibrillarin                                          | Fbl            | Fbl                                  |              |                 | Fbl             |                                                 |                                                                                      |        |
| Fubp1       | far upstream element binding protein 1               |                |                                      |              |                 | Fubp1           |                                                 |                                                                                      | YES    |
| G3bp1       | GTPase activating protein binding protein 1          |                |                                      |              |                 | G3bp1           |                                                 |                                                                                      | YES    |
| Gapdh       | glyceraldehyde-3-phosphate dehydrogenase             |                |                                      |              |                 | Gapdh           |                                                 |                                                                                      |        |
| H2afz       | H2A.Z variant histone 1                              |                |                                      |              |                 | H2afz           |                                                 |                                                                                      | YES    |
| Helb        | helicase B                                           | Helb           | Helb                                 |              |                 | Helb            |                                                 |                                                                                      |        |
| Hist1h3g    | H3 clustered histone 8                               |                |                                      |              |                 | Hist1h3g        |                                                 |                                                                                      |        |
| Hmgb2       | high mobility group box 2                            |                |                                      |              |                 | Hmgb2           |                                                 |                                                                                      | YES    |
| Hnmpab      | heterogeneous nuclear ribonucleoprotein A/B          |                |                                      |              |                 | Hnmpab          |                                                 |                                                                                      | YES    |
| Hnmpc       | heterogeneous nuclear ribonucleoprotein C            | Hnmpc          |                                      | Hnmpc        | Hnmpc           | Hnmpc           | Hnmpc                                           | Hnmpc                                                                                |        |
| HnmpL       | heterogeneous nuclear ribonucleoprotein L            | HnmpL          |                                      | HnmpL        | HnmpL           | HnmpL           | Hnmpm                                           | Hnmpm                                                                                |        |
| Hnmpm       | heterogeneous nuclear ribonucleoprotein M            | Hnmpm          |                                      | Hnmpm        | Hnmpm           | Hnmpm           | Hnmpu                                           | Hnmpu                                                                                |        |
| Hnmpu       | heterogeneous nuclear ribonucleoprotein U            | Hnmpu          |                                      | Hnmpu        | Hnmpu           | Hnmpu           |                                                 |                                                                                      | YES    |
| Hsp90aa1    | heat shock protein 90, alpha, class A member 1       |                | Hsp90aa1                             |              |                 | Hsp90aa1        |                                                 |                                                                                      |        |
| Hsp90ab1    | heat shock protein 90, alpha, class B member 1       |                | Hsp90ab1                             |              |                 | Hsp90ab1        |                                                 |                                                                                      |        |
| Hspa8       | heat shock protein 8                                 | Hspa8          |                                      | Hspa8        | Hspa8           | Hspa8           | Hspa8                                           | Hspa8                                                                                |        |
| Hspb1       | heat shock protein 1                                 |                |                                      |              |                 | Hspb1           |                                                 |                                                                                      |        |
| Hspd1       | heat shock protein 1 (chaperonin)                    |                |                                      |              |                 | Hspd1           |                                                 |                                                                                      |        |
| Mak16       | MAK16 homolog                                        | Mak16          | Mak16                                |              |                 | Mak16           |                                                 |                                                                                      |        |
| Msh6        | mutS homolog 6                                       |                |                                      |              |                 | Msh6            |                                                 |                                                                                      | YES    |
| Mybbp1a     | MYB binding protein 1a                               |                | Mybbp1a                              |              |                 | Mybbp1a         |                                                 |                                                                                      | YES    |
| Naa25       | N(alpha)-acetyltransferase 25                        |                |                                      |              |                 | Naa25           |                                                 |                                                                                      |        |
| Ncl         | nucleolin                                            | Ncl            | Ncl                                  | Ncl          | Ncl             | Ncl             | Ncl                                             | Ncl                                                                                  | YES    |
| Nop56       | NOP56 ribonucleoprotein                              |                | Nop56                                |              |                 |                 |                                                 |                                                                                      |        |
| Nop58       | NOP58 ribonucleoprotein                              |                | Nop58                                |              |                 |                 |                                                 |                                                                                      |        |
| Npm1        | nucleophosmin 1                                      | Npm1           | Npm1                                 | Npm1         | Npm1            | Npm1            | Npm1                                            | Npm1                                                                                 | YES    |
| Pabpc1      | poly(A) binding protein, cytoplasmic 1               | Pabpc1         |                                      | Pabpc1       | Pabpc1          | Pabpc1          |                                                 |                                                                                      |        |
| Park7       | Parkinson disease 7                                  |                |                                      |              |                 | Park7           |                                                 |                                                                                      | YES    |
| Parp1       | poly (ADP-ribose) polymerase family, member 1        |                |                                      |              |                 | Parp1           |                                                 |                                                                                      | YES    |
| Pcbp1       | poly(rC) binding protein 1                           | Pcbp1          |                                      |              | Pcbp1           | Pcbp1           |                                                 |                                                                                      | YES    |
| Pcna        | proliferating cell nuclear antigen                   |                |                                      |              |                 | Pcna            |                                                 |                                                                                      | YES    |
| Phb2        | prohibitin 2                                         |                |                                      |              |                 | Phb2            |                                                 |                                                                                      |        |
| Ppia        | peptidylprolyl isomerase A                           |                |                                      |              |                 | Ppia            |                                                 |                                                                                      |        |
| Ppid        | peptidylprolyl isomerase D                           |                |                                      |              |                 | Ppid            |                                                 |                                                                                      |        |
| Pmt1        | protein arginine N-methyltransferase 1               | Pmt1           |                                      | Pmt1         |                 | Pmt1            |                                                 |                                                                                      |        |
| Psip1       | PC4 and SFRS1 interacting protein 1                  | Psip1          | Psip1                                | Psip1        | Psip1           | Psip1           | Psip1                                           | Psip1                                                                                | YES    |
| Ptbp1       | polypyrimidine tract binding protein 1               | Ptbp1          |                                      | Ptbp1        | Ptbp1           | Ptbp1           | Ptbp1                                           | Ptbp1                                                                                | YES    |
| Ptges3      | prostaglandin E synthase 3                           |                | Ptges3                               |              |                 | Ptges3          |                                                 |                                                                                      |        |
| Rbbp4       | retinoblastoma binding protein 4                     |                |                                      |              |                 | Rbbp4           |                                                 |                                                                                      |        |
| Ran         | RAN, member RAS oncogene family                      |                | Ran                                  |              |                 |                 |                                                 |                                                                                      |        |
| Rpl14       | ribosomal protein L14                                | Rpl14          | Rpl14                                |              |                 | Rpl14           |                                                 |                                                                                      |        |
| Rpl18a      | ribosomal protein L18A                               |                |                                      |              |                 | Rpl18a          |                                                 |                                                                                      |        |
| Rpl23a      | ribosomal protein L23A                               |                | Rpl23a                               |              |                 | Rpl23a          |                                                 |                                                                                      |        |
| Rpl27       | ribosomal protein L27                                | Rpl27          | Rpl27                                |              |                 | Rpl27           |                                                 |                                                                                      |        |
| Rpl4        | ribosomal protein L4                                 |                |                                      |              |                 | Rpl4            |                                                 |                                                                                      |        |
| Rpl5        | ribosomal protein L5                                 | Rpl5           | Rpl5                                 |              |                 | Rpl5            |                                                 |                                                                                      |        |
| Rpl6        | ribosomal protein L6                                 |                | Rpl6                                 |              |                 | Rpl6            |                                                 |                                                                                      |        |
| Rpl7a       | ribosomal protein L7A                                | Rpl7a          | Rpl7a                                |              |                 | Rpl7a           |                                                 |                                                                                      |        |
| Ruvbl2      | RuvB-like protein 2                                  |                | Ruvbl2                               |              |                 | Ruvbl2          |                                                 |                                                                                      |        |
| Sf3b3       | splicing factor 3b, subunit 3                        | Sf3b3          |                                      | Sf3b3        | Sf3b3           | Sf3b3           | Sf3b3                                           | Sf3b3                                                                                |        |
| Srsf1       | serine and arginine-rich splicing factor 1           | Srsf1          | Srsf1                                | Srsf1        | Srsf1           | Srsf1           | Srsf1                                           | Srsf1                                                                                |        |
| Srsf3       | serine and arginine-rich splicing factor 3           | Srsf3          |                                      | Srsf3        | Srsf3           | Srsf3           | Srsf3                                           | Srsf3                                                                                |        |
| Srsf4       | serine and arginine-rich splicing factor 4           | Srsf4          |                                      | Srsf4        | Srsf4           | Srsf4           | Srsf4                                           | Srsf4                                                                                |        |
| Srsf6       | serine and arginine-rich splicing factor 6           | Srsf6          | Srsf6                                | Srsf6        | Srsf6           | Srsf6           | Srsf6                                           | Srsf6                                                                                |        |
| Srsf7       | serine and arginine-rich splicing factor 7           | Srsf7          |                                      | Srsf7        | Srsf7           | Srsf7           | Srsf7                                           | Srsf7                                                                                |        |
| Tbl3        | transducin (beta)-like 3                             | Tbl3           | Tbl3                                 |              |                 |                 |                                                 |                                                                                      |        |
| Tcof1       | treacle ribosome biogenesis factor 1                 |                |                                      |              |                 | Tcof1           |                                                 |                                                                                      |        |
| Thrap3      | thyroid hormone receptor associated protein 3        | Thrap3         |                                      | Thrap3       | Thrap3          | Thrap3          | Thrap3                                          | Thrap3                                                                               | YES    |
| Trim28      | tripartite motif-containing 28                       |                |                                      |              |                 | Trim28          |                                                 |                                                                                      | YES    |
| Ybx1        | Y box protein 1                                      | Ybx1           |                                      | Ybx1         | Ybx1            | Ybx1            |                                                 |                                                                                      | YES    |

**Table S3.** Oligonucleotide sequences for plasmid construction**Guide RNA Sequences**

|               |                                   |
|---------------|-----------------------------------|
| sgNanog-1     | 5'-CACC GCTGTAAGGTGACCCAGACT-3'   |
|               | 5'-AAAC AGTCTGGGTACCTTACAGC-3'    |
| sgNanog-2     | 5'-CACC GTGGGGCGTGGGTGCCGCCT-3'   |
|               | 5'-AAAC AGGCGGCACCCACGCCCCAC-3'   |
| sgNanog-3     | 5'-CACC GCTCAAGGCGATAGATTAA-3'    |
|               | 5'-AAAC TTAAATCTATCGCCTTGAGC-3'   |
| Mock (sgGal4) | 5'-CACC GAACGACTAGTTAGGCGTGTA-3'  |
|               | 5'-AAAC TACACGCCTAACTAGTCGTTTC-3' |
| sgRex1(+)     | 5'-CACC GCAAAGACAAGTGGCCAGAA-3'   |
|               | 5'-AAAC TTCTGGCCACTGTCTTTGC-3'    |
| sgRex1(-)     | 5'-CACC GCTCTTCCGCCCGGCCCTTTC-3'  |
|               | 5'-AAAC GAAAGGGCCGGCGGAAGAGC-3'   |

**shRNA Oligo Sequences**

|            |                                                                               |
|------------|-------------------------------------------------------------------------------|
| shBclaf1-1 | 5'-GATCCGGATCTGGCTCTGTTGGAAATTCAAGAGAATTTCCAACAGAGCCAGATCCTTTTTGGAAAAG-3'     |
|            | 5'-AATTCTTTTCCAAAAAAGGATCTGGCTCTGTTGGAAATTCTCTTGAAATTTCCAACAGAGCCAGATCCG-3'   |
| shBclaf1-2 | 5'-GATCCGGTTCATCATGTGAAAGAATTCAAGAGATTCTTTCACATGATGAACCTTTTTGGAAAAG-3'        |
|            | 5'-AATTCTTTTCCAAAAAAGGTTTCATCATGTGAAAGAATCTCTTGAATTTCTTCACATGATGAACCG-3'      |
| shFubp1-1  | 5'-GATCCGCTGGTACATCATTGAATTCATTCAAGAGATGAATTCATGATGTACCAGCTTTTTGGAAAAG-3'     |
|            | 5'-AATTCTTTTCCAAAAAAGCTGGTACATCATTGAATTCATCTCTTGAATGAATTCATGATGTACCAGCG-3'    |
| shFubp1-2  | 5'-GATCCGGACAGGTTGATTATACAATTCAAGAGATTGTATAATCAACCTGTCCTTTTTGGAAAAG-3'        |
|            | 5'-AATTCTTTTCCAAAAAAGGACAGGTTGATTATACAATCTCTTGAATTGTATAATCAACCTGTCCG-3'       |
| shMsh6-1   | 5'-GATCCGAGGTGCATGAGGCTTATTATTCAGAGATAAATAAGCCTCATGCACCTCTTTTTGGAAAAG-3'      |
|            | 5'-AATTCTTTTCCAAAAAAGAGGTGCATGAGGCTTATTATCTCTTGAATAAATAAGCCTCATGCACCTCG-3'    |
| shMsh6-2   | 5'-GATCCGCTACTGAGTAAGATTCAATTTCAAGAGAATGAATCTTACTCAGTAGCTTTTTGGAAAAG-3'       |
|            | 5'-AATTCTTTTCCAAAAAAGCTACTGAGTAAGATTCAATCTCTTGAATGAATCTTACTCAGTAGCG-3'        |
| shPark7-1  | 5'-GATCCGCAGTGTAGCCGTGATGTAATTTCAAGAGAATTACATCACGGCTACACTGCTTTTTGGAAAAG-3'    |
|            | 5'-AATTCTTTTCCAAAAAAGCAGTGTAGCCGTGATGTAATCTCTTGAATTTACATCACGGCTACACTGCG-3'    |
| shPark7-2  | 5'-GATCCGCTGCAGTCTTTAAGAAATTTCAAGAGAATTTCTTAAAGACTGCAGCTTTTTGGAAAAG-3'        |
|            | 5'-AATTCTTTTCCAAAAAAGCTGCAGTCTTTAAGAAATTTCTTGAATTTCTTAAAGACTGCAGCG-3'         |
| shPsp1-1   | 5'-GATCCGTTATTGATGAAGATAAATAACCTGACCCATTATTATCTTCATCAATAACCTTTTTGGAAAAG-3'    |
|            | 5'-AATTCTTTTCCAAAAAAGGTTATIGATGAAGATAAATAATGGGTCAGGTTATTATCTTCATCAATAACCG-3'  |
| shPsp1-2   | 5'-GATCCGCAATGAGGATGTGACTAAAGTTCAAGAGACTTTCATCCTCATTGCTTTTTGGAAAAG-3'         |
|            | 5'-AATTCTTTTCCAAAAAAGCAATGAGGATGTGACTAAAGTCTTGAACCTTTCATCCTCATTGCG-3'         |
| shThrap3-1 | 5'-GATCCGGGATATATAGTAATATTATAACCTGACCCATTATAATATTACTATATATCCCTTTTTGGAAAAG-3'  |
|            | 5'-AATTCTTTTCCAAAAAAGGGATATATAGTAATATTATAATGGGTCAGGTTATAATATTACTATATATCCCG-3' |
| shThrap3-2 | 5'-GATCCGGAGCTGGATGAGCACGATAATTCAGAGATTATCGTGCTCATCCAGCTCCTTTTTGGAAAAG-3'     |
|            | 5'-AATTCTTTTCCAAAAAAGGAGCTGGATGAGCACGATAATCTCTTGAATTATCGTGCTCATCCAGCTCCG-3'   |
| shOct4     | 5'-GATCCGCCTTAAGAACATGTGTAAATTCAGAGATTACACATGTTCTTAAGGCTTTTTGGAAAAG-3'        |
|            | 5'-AATTCTTTTCCAAAAAAGCCTTAAGAACATGTGTAAATCTCTTGAATTACACATGTTCTTAAGGCG-3'      |

**Donor Oligo Sequences (Oligo's for Amplifying Nanog promoter region)**

|                  |                                         |
|------------------|-----------------------------------------|
| Nanog (Promoter) | 5'-TAGCCTGCAGGTCATCCCCACTTGACCTGAAAC-3' |
|                  | 5'-TATCGAATTCGTCCAGCCTTCCACAGAAAGAGC-3' |

**Table S4.** Primer sequences for PCR**Nanog enrichment primers (For CAPTURE & ChIP-qPCR)**

|           |                              |
|-----------|------------------------------|
| CAPTURE   | 5'-GGTCACCTTACAGCTTCTTTTG-3' |
|           | 5'-TATTCTCCAGGCACCCAG-3'     |
| ChIP-qPCR | 5'-GCAGGACCTACCCITTTAAATC-3' |
|           | 5'-CCCACAGAAAGAGCAAGAC-3'    |

**RT-qPCR primers**

|                |                                 |
|----------------|---------------------------------|
| <i>mThrap3</i> | 5'-AGAAAAGCCCAGAGATACACAG-3'    |
|                | 5'-TATTTTCCCTCAGCCTTGTAGCC-3'   |
| <i>mBclaf1</i> | 5'-TGTGAAGATGACGAAGAGACC-3'     |
|                | 5'-CAAGTTCTGCTCCCTGTTGC-3'      |
| <i>mPsp1</i>   | 5'-CGAGGAAGAAAGAGAAAGGCTG-3'    |
|                | 5'-AGGTCTGCCCTCTTGGTTTG-3'      |
| <i>mPark7</i>  | 5'-TGCAGTGTAGCCGTGATGTA-3'      |
|                | 5'-TATGGTCCCTGCGTTTTTGC-3'      |
| <i>mFubp1</i>  | 5'-GCTACAACCCAAACGAACGG-3'      |
|                | 5'-AGGAACTGCTTGACCCATTTTC-3'    |
| <i>mMsh6</i>   | 5'-CGTGCCCTCCAGTTCTTG-3'        |
|                | 5'-GGACAGATTTCCCTTTCTCCG-3'     |
| <i>mTBP</i>    | 5'-TATCTGCTGGCGGTTTGGC-3'       |
|                | 5'-TGAAATAGTGATGCTGGGCAC-3'     |
| <i>mT</i>      | 5'-GCTTCAAGGAGCTAACTAACGAG-3'   |
|                | 5'-CCAGCAAGAAAGAGTACATGGC-3'    |
| <i>mNanog</i>  | 5'-ACCTGAGCTATAAGCAGGTTAAGAC-3' |
|                | 5'-GTGCTGAGCCCTTCTGAATCAGAC-3'  |
| <i>mRex1</i>   | 5'-ATACCACTGACCAAAAAGCAGG-3'    |
|                | 5'-GCCACTTGCTTTGCCGTTTC-3'      |
| <i>mOct4</i>   | 5'-AGCATTGAGAACCGTGTGAGG-3'     |
|                | 5'-AACCATACTCGAACCACATCC-3'     |
| <i>mFgf5</i>   | 5'-AAGTAGCGCGACGTTTCTTC-3'      |
|                | 5'-CTGGAAACTGCTATGTTCCGAG-3'    |
| <i>mMeox1</i>  | 5'-ACAGCCTTCACCAAGGAGC-3'       |
|                | 5'-CCCCTTCACACGTTTCCA-3'        |
| <i>mGata6</i>  | 5'-GGCTCTGTCCCTATGACTCC-3'      |
|                | 5'-TGATGCCCTACCCCTGAG-3'        |

**Genotyping primers**

|                          |                            |
|--------------------------|----------------------------|
| WT                       | 5'-AAACGGCAAAGACAAGTGGC-3' |
|                          | 5'-ACTGCCAAAGTTGGCCATTC-3' |
| Knock-IN (EB5/ReKO-Puro) | 5'-TGCAACTTACCTCCGGGATG-3' |
|                          | 5'-ACTGCCAAAGTTGGCCATTC-3' |
| Cre (EB5/ReKO)           | 5'-CCGACGCCGACCAACACC-3'   |
|                          | 5'-ACTGCCAAAGTTGGCCATTC-3' |
